# Supplementary material for: Cesium adsorption/desorption behavior of clay minerals considering actual contamination conditions in Fukushima
Source: PubMed Central journal article supplement (PMC4751473; doi:10.1038/srep21543), 2016-02-12
Supplement: srep21543-s1.pdf [file srep21543-s1.pdf]

Supplimentary Information for

**Cesium adsorption/desorption behavior of clay minerals considering  
actual contamination conditions in Fukushima**

Hiroki Mukai<sup>1</sup>, Atsushi Hirose<sup>2</sup>, Satoko Motai<sup>1</sup>, Ryosuke Kikuchi<sup>1</sup>, Keitaro  
Tanoi<sup>2</sup>, Tomoko M. Nakanishi<sup>2</sup>, Tsuyoshi Yaita<sup>3</sup> and Toshihiro Kogure<sup>1,\*</sup>

<sup>1</sup>Graduate School of Sciences, The University of Tokyo, Bunkyo, Tokyo 113-0033, Japan

<sup>2</sup>Graduate School of Agricultural and Life Sciences, The University of Tokyo, Bunkyo, Tokyo  
113-0033, Japan

<sup>3</sup>Quantum Beam Science Center and Fukushima Environmental Safety Center, Japan Atomic  
Energy Agency, 1-1-1 Kouto, Sayo-cho, Sayo-gun, Hyogo 679-5148, Japan

\*Corresponding author: Toshihiro Kogure, Department of Earth and Planetary Science,  
Graduate School of Sciences, The University of Tokyo, 7-3-1 Hongo, Bunkyo-ku, Tokyo  
113-0033, Japan

Tel: +81-3-5841-4548

Fax: +81-3-5841-4555

[kogure@eps.s.u-tokyo.ac.jp](mailto:kogure@eps.s.u-tokyo.ac.jp)

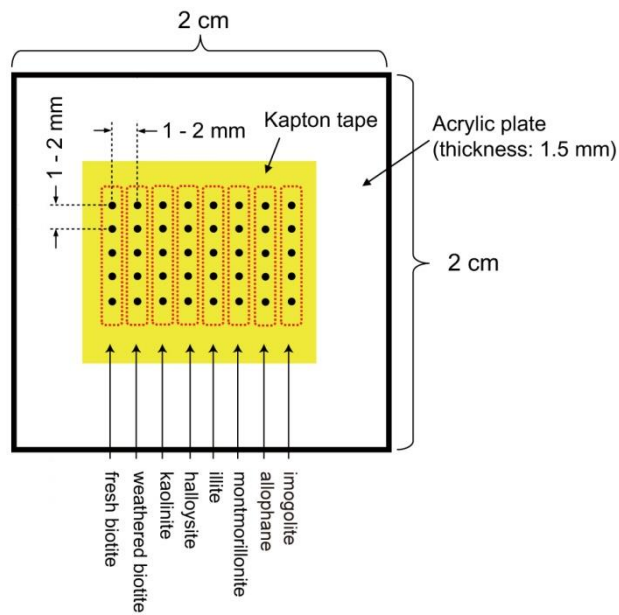

**Figure S1.** A design for the substrate on which fine mineral particles are located with double-stick Kapton tape and a vacuum tweezers on a micromanipulator.

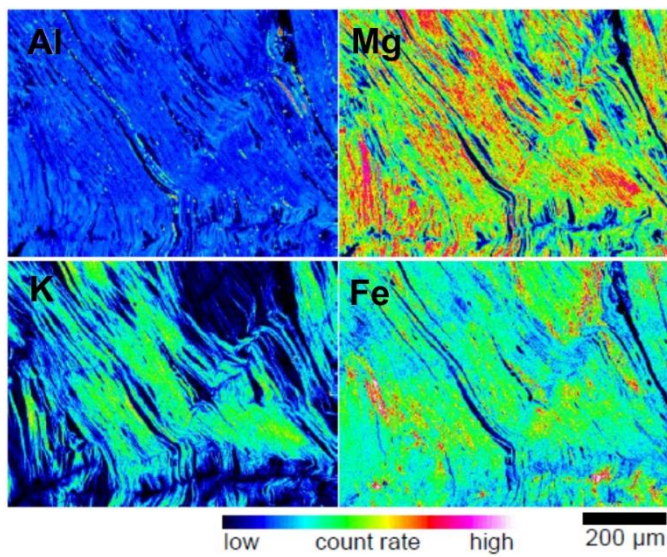

**Figure S2.** Chemical map of Al., Mg, K and Fe from a petrographic thin section of weathered biotite (WB) obtained using an electron-probe microanalyzer.

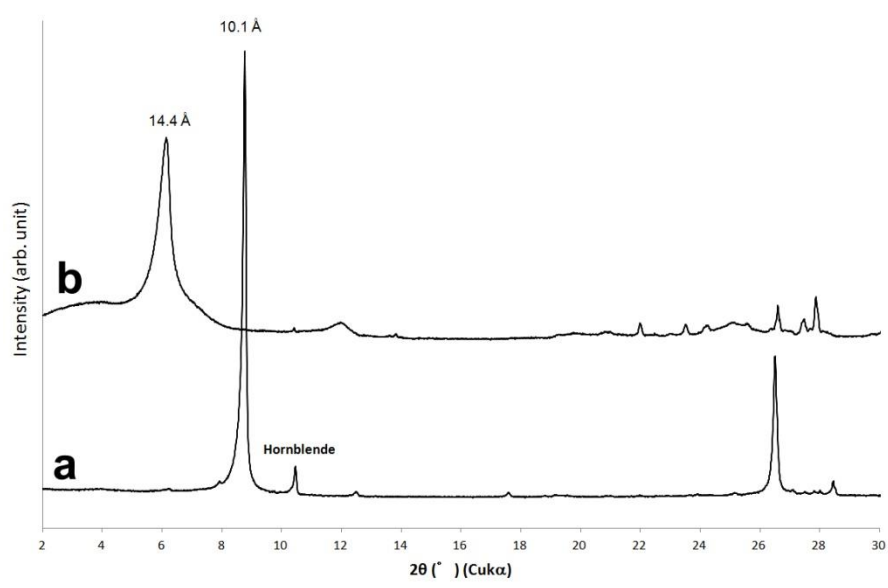

**Figure S3.** X-ray diffraction patterns from (a) fresh biotite (FB) and (b) weathered biotite (WB) used in the experiments.

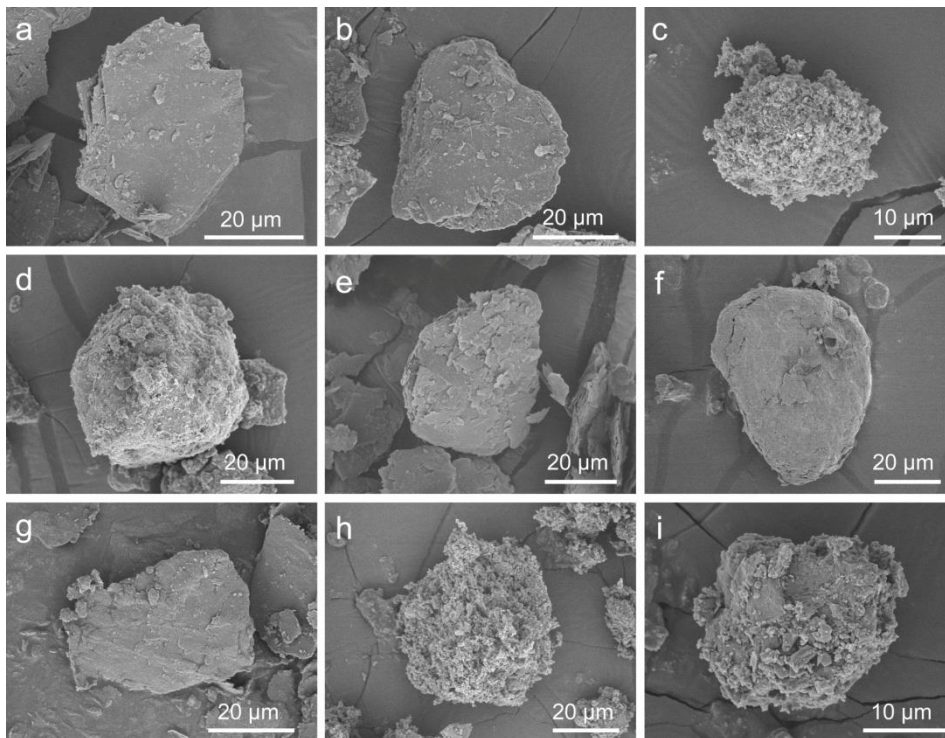

**Figure S4.** Morphologies of the mineral particles; (a) fresh biotite, (b) weathered biotite, (c) kaolinite, (d) halloysite, (e) illite, (f) montmorillonite, (g) Swa-1, (h) allophane, (i) imogolite. The images were taken using a Hitachi S-4500 scanning electron microscope with a field-emission gun operated at 5kV.

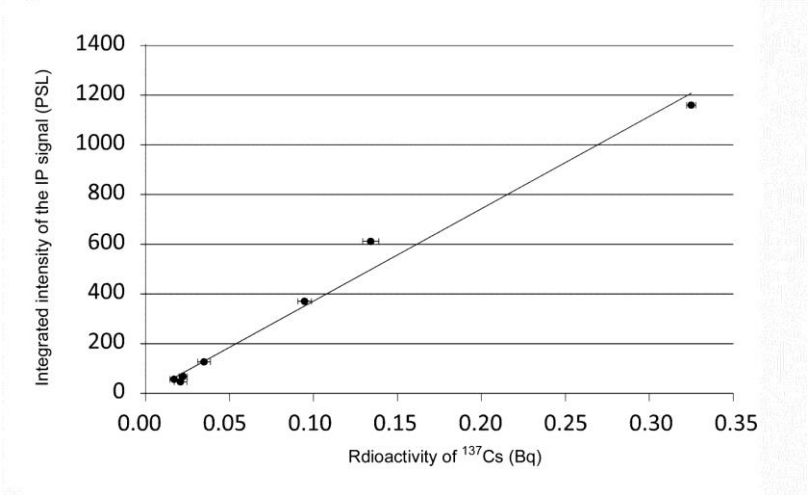

**Figure S5.** Correlation between radioactivity of <sup>137</sup>Cs in fine mineral particles less than 50 μm in size measured using a germanium radiation spectrometer and integrated IP signal intensities inside the spotty images formed by the radiation from the particles on the IP.
